1 **Cosmid based mutagenesis causes genetic instability in**  
2 ***Streptomyces coelicolor*, as shown by targeting of the**  
3 **lipoprotein signal peptidase gene**

4

5 John T Munnoch<sup>1</sup>, David A. Widdick<sup>1,2</sup>, Govind Chandra<sup>2</sup>, Iain C. Sutcliffe<sup>3</sup>, Tracy Palmer<sup>4</sup> and Matthew I  
6 Hutchings<sup>1\*</sup>

7

8 <sup>1</sup>School of Biological Sciences, University of East Anglia, Norwich Research Park, Norwich

9 <sup>2</sup>Department of Molecular Microbiology, John Innes Centre, Norwich Research Park, Norwich

10 <sup>3</sup> School of Applied Sciences, Northumbria University, Newcastle

11 <sup>4</sup> Division of Molecular Microbiology, College of Life Sciences, University of Dundee, Dundee.

12 \* **Correspondence: [M.hutchings@uea.ac.uk](mailto:M.hutchings@uea.ac.uk)**

13 **Abstract.**

14 Bacterial lipoproteins are a class of extracellular proteins tethered to cell membranes by covalently attached  
15 lipids. Deleting the lipoprotein signal peptidase (*lsp*) gene in *Streptomyces coelicolor* results in growth and  
16 developmental defects that cannot be restored by reintroducing the *lsp*. We report resequencing of the genomes  
17 of the wild-type M145 and the *cis*-complemented  $\Delta$ *lsp* mutant (BJT1004), mapping and identifying secondary  
18 mutations, including an insertion into a novel putative small RNA, *scr6809*. Disruption of *scr6809* led to a range  
19 of developmental phenotypes. However, these secondary mutations do not increase the efficiency of disrupting  
20 *lsp* suggesting they are not *lsp* specific suppressors. Instead we suggest that these were induced by introducing  
21 the cosmid St4A10 $\Delta$ *lsp* as part of the Redirect mutagenesis protocol, which transiently duplicates a number of  
22 important cell division genes. Disruption of *lsp* using no gene duplication resulted in the previously observed  
23 phenotype. We conclude that *lsp* is not essential in *S. coelicolor* but loss of *lsp* does lead to developmental  
24 defects due to the loss of lipoproteins from the cell. Significantly, our results indicate the use of cosmid libraries  
25 for the genetic manipulation of bacteria can lead to unexpected phenotypes not necessarily linked to the gene or  
26 pathway of interest.

27

28

## 29 **Introduction**

30 Bacterial lipoproteins are essential for building and maintaining the cell envelope and also provide a key  
31 interface with the external environment<sup>1-3</sup> Most lipoprotein precursors are exported as unfolded polypeptides via  
32 the Sec (general secretory) pathway but others can be exported via the twin arginine transport (Tat) pathway,  
33 which is typically utilised for the transport of fully folded proteins<sup>4-6</sup> The signal peptides of lipoproteins closely  
34 resemble other types of bacterial Sec and Tat signal peptide but they contain a characteristic lipobox motif,  
35 typically L<sub>-3</sub>-A/S<sub>-2</sub>-G/A<sub>-1</sub>-C<sub>+1</sub>, relative to the signal cleavage site, in which the cysteine residue is essential and  
36 invariant. The lipobox motif allows putative lipoproteins to be easily identified in bacterial genome sequences  
37 <sup>3,7</sup>.

38 Following translocation, lipoprotein precursors are firstly modified by covalent attachment of a  
39 diacylglycerol molecule, derived from a membrane phospholipid, to the thiol of the conserved lipobox cysteine  
40 residue via a thioether linkage. This reaction is catalysed by an enzyme named Lgt (Lipoprotein diacylglycerol  
41 transferase) and results in a diacylated lipoprotein. Lsp (Lipoprotein signal peptidase) then cleaves the signal  
42 sequence immediately upstream of the lipidated cysteine to leave it at the +1 position. These early steps in  
43 lipoprotein biogenesis are highly conserved and unique to bacteria making them potential targets for antibacterial  
44 drug development<sup>2,8</sup>. In Gram-negative bacteria and Gram-positive Actinobacteria, lipoproteins can be further  
45 modified by addition of an amide-linked fatty acid to the amino group of the diacylated cysteine residue at the  
46 mature N-terminus. This final step is catalysed by the enzyme Lnt (Lipoprotein n-acyltransferase) and results in  
47 triacylated lipoproteins. In Gram-negative proteobacteria, Lnt modification is a pre-requisite for the recognition  
48 of lipoproteins by the Lol machinery, which transports lipoproteins to the outer membrane<sup>2,9</sup> but its function in  
49 monoderm Gram-positive bacteria is not known. Members of the Gram-positive phyla Firmicutes and Mollicutes  
50 also N-acylate lipoproteins despite lacking Lnt homologues and *S. aureus* can diacylate or triacylate individual  
51 lipoproteins in an environmentally dependent manner<sup>10-14</sup>. These studies suggest that triacylation of lipoproteins  
52 in Gram-positive bacteria has an important role in their natural environment but is dispensable *in vitro*. Loss of  
53 Lnt activity in *Streptomyces* bacteria has no obvious effect on fitness or lipoprotein localisation *in vitro* but it  
54 does have a moderate effect on virulence in the plant pathogen *Streptomyces scabies*, supporting the idea that it  
55 has environmental importance<sup>15</sup>.

56 We previously characterised all four steps of the lipoprotein biogenesis pathway in *Streptomyces* spp.  
57 (Figure 1)<sup>5,15</sup>, which is one of the best studied genera in the Gram-positive phylum Actinobacteria. Our key

58 findings are (i) that Tat exports ~20% of lipoprotein precursors in streptomycetes; (ii) they N-acylate  
59 lipoproteins using two non-essential Lnt enzymes; (iii) *Streptomyces coelicolor* encodes two functional copies of  
60 Lgt which cannot be removed in the same strain; (iv) *lsp* mutants can be isolated at low frequencies but they  
61 acquire spontaneous secondary mutations which might be *lsp* suppressors. It was recently reported that Lgt is  
62 essential in *Mycobacterium tuberculosis*, which is also a member of the phylum Actinobacteria, and that *lgt*  
63 deletion in the fast-growing species *Mycobacterium smegmatis* is accompanied by spontaneous secondary  
64 mutations<sup>16</sup>. Natural product antibiotics that target the lipoprotein biogenesis pathway include globomycin,  
65 made by *Streptomyces globisporus*<sup>2</sup> and antibiotic TA made by *Myxococcus xanthus*<sup>1,16</sup>. Both inhibit Lsp  
66 activity and are lethal to *Escherichia coli* but TA resistance arises through spontaneous *IS3* insertion into the *lpp*  
67 gene, which encodes an abundant lipoprotein that attaches the *E. coli* outer membrane to the peptidoglycan cell  
68 wall<sup>16,17</sup>. Over-expressing *lsp* also confers TA resistance in both *E. coli* and *M. xanthus*, and the latter encodes  
69 additional Lsp homologues within the TA biosynthetic gene cluster<sup>17</sup>.

70 Deletion of *S. coelicolor lsp* results in very small and flat colonies that are delayed in sporulation and  
71 these *lsp* mutants could not be fully complemented even by reintroducing the *lsp* gene to its native locus.  
72 Although both *cis* and *in trans* complementation restored lipoprotein biogenesis and sporulation it did not restore  
73 the wild-type growth rate<sup>5</sup>. There are two likely reasons for this: either *lsp* is essential and the mutant strains  
74 acquire secondary suppressor mutations, or the Redirect PCR targeting method that we used to delete the *lsp*  
75 gene resulted in chromosomal rearrangements and mutations independent of *lsp*. Here we provide evidence to  
76 support the second hypothesis and we demonstrate that introduction of the cosmid carrying an ~40 kb region of  
77 the *S. coelicolor* chromosome, including *lsp*, from *E. coli* to *S. coelicolor* transiently duplicates cell division and  
78 cell wall biosynthesis genes which leads to secondary mutations including disruption of a putative small RNA.  
79 We further confirm that *lsp* is non-essential but deletion of the *lsp* gene does lead to growth and developmental  
80 delays and the over-production of the antibiotic actinorhodin in *S. coelicolor*, as observed previously. These  
81 phenotypes must therefore be due to the loss of lipoproteins from its cytoplasmic membrane.

## 82 **Results**

### 83 **Mapping secondary mutations in the *cis* complemented $\Delta$ *lsp* strain**

#### 84 **BJT1004**

85 We previously reported that the *S. coelicolor*  $\Delta$ *lsp* mutant BJT1001 cannot be complemented even by restoring  
86 *lsp* to its native locus<sup>5</sup>. Since *cis* complementation should effectively restore the genome to wild-type this  
87 suggests that other spontaneous mutations have occurred during the genetic manipulations. To test this we  
88 Illumina sequenced the genomes of the parent strain *S. coelicolor* M145 and the *cis*-complemented  $\Delta$ *lsp* strain  
89 BJT1004 using two independent companies (GATC Biotech and The Genome Analysis Centre). Across the four  
90 sequence samples a total of 51 unique single nucleotide polymorphisms (SNPs) were detected (Supplementary  
91 Table S1 online) as well as a chromosomal rearrangement in BJT1004 that is not present in the parent strain  
92 M145 (Figure 2(A-B) and Supplementary Text S1 and S2 online). Of the 51 SNPs, 13 are unique to one of the  
93 BJT1004 sequences, with 4 residing inside coding regions. However of all of these only one SNP occurs in both  
94 BJT1004 sequences and this is in the intergenic region between *sco5331* and *sco5332*. In the single  
95 chromosomal rearrangement, the *IS21* insertion element (genes *sco6393* and *sco6394*) has inserted into the  
96 intergenic region between the *sco6808* and *sco6809* genes and this was confirmed by PCR (Figure 2(A-C)).  
97 Although this might affect the downstream promoter of *sco6808*, which encodes a putative regulator, deletion of  
98 *sco6808* (using vector pJM010) had no effect on growth or development under standard laboratory conditions  
99 (Figure 3(A)). The intergenic position of *IS21* in BJT1004 suggested it might disrupt a non-coding RNA and  
100 examination of RNA sequence data for *S. coelicolor* M145 confirmed the presence of a 189 nt transcript  
101 initiating 107 bp upstream of *sco6808* and reading into the last 82 nucleotides of the *sco6809* gene (data from  
102 GSM1121652 and GSM1121655 RNA sequencing; Supplementary Text S1 and 2 online; Figure 2(A-B)).  
103 Following convention we named this putative small RNA *scr6809* for *S. coelicolor* RNA 6809. Deletion of the  
104 *scr6809* (pJM012) sequence (without disrupting either the *sco6808* or *sco6809* coding sequences) resulted in a  
105 range of phenotypes from colonies that look like wild-type to non-sporulating bald and white mutants defective  
106 in aerial hyphae formation and sporulation, respectively, antibiotic overproducers and small slow growing  
107 colonies. Restreaking the  $\Delta$ *scr6809* colonies (double crossovers) with wild-type appearance again gave rise  
108 within the next generation to a range of colonies with different morphologies, including growth and  
109 developmental defects (Figure 3(B)). Colonies with mutated morphologies would retain that morphology in

110 subsequent generations indicating another situation where spontaneous secondary mutations are arising. A  
111 previous report showed that a *sco6808* deletion mutant had accelerated production of actinorhodin and  
112 undecylprodigiosin as well as precocious spore formation on R5 medium<sup>18</sup>. There was no observable difference  
113 between the wild-type and  $\Delta$ *sco6808* strains under the growth conditions used here but disruption of *sco6808* in  
114 strain BJT1004 resulted in an improvement in sporulation (Figure 3(A)). We suspect this difference is based on  
115 the recovery of the *scr6809* loci to wildtype as result of the double crossovers between the chromosome of  
116 BJT1004 and the  $\Delta$ *sco6808* deletion cosmid St1A2 $\Delta$ *sco6808*. This was also seen for St1A2 $\Delta$ *sco6811*  
117 disruptions in each background (not shown).

118 To determine whether *IS21* insertion into *scr6809* is induced by deletion of *lsp*, we isolated ten more  
119 non-clonal *lsp* mutants by introducing cosmid St4A10 $\Delta$ *lsp* (pJM014) into wild-type strain M145 and then PCR  
120 amplified the intergenic region between *sco6808* and *sco6809*. The size of the PCR products matched the  
121 predicted wild-type size and indicated that none of these *lsp* mutants contain an *IS21* insertion suggesting that  
122 the original observation is not specific to *lsp* mutants (Figure 4). Consistent with this conclusion, the frequency  
123 with which *lsp* mutants could be isolated was not increased in BJT1004 relative to M145 suggesting that none of  
124 the mapped mutations in BJT1004 suppress fitness defects that arise from deleting  $\Delta$ *lsp*. Attempts at over-  
125 expressing *scr6809* using pJM017 in *S. coelicolor* M145, *S. scabies* 87-22 and *S. venezualae* ATCC 10712  
126 resulted in no observable phenotype but as the same vectors failed to prevent accumulation of developmental  
127 phenotypes in the  $\Delta$ *scr6809* strain, this suggests that functional *scr6809* is not expressed from these vectors.

128 Cumulatively these results suggested that deletion of *lsp* does not result in secondary mutations and  
129 prompted us to hypothesise that these accumulate as a result of duplicating cell division genes on cosmid St4A10  
130 which was used to delete *lsp*. These results further suggest a role for *scr6809* in *S. coelicolor* differentiation,  
131 although there is no obvious link to *lsp* and so this was not pursued further here.

132

## 133 **Introduction of wild-type St4A10 results in a pleiotropic** 134 **phenotype**

135 The Redirect PCR-targeting method uses *E. coli* as a host strain for an *S. coelicolor* cosmid library which can be  
136 used to make targeted deletions<sup>19,20</sup>. The Redirect method was used to PCR-target the *lsp* gene *sco2074* on  
137 cosmid St4A10, which contains a ~40 kb region of the *S. coelicolor* genome spanning genes *sco2069-2104*  
138 (Supplementary Table S2 online). Conjugation of St4A10 $\Delta$ *lsp* into *S. coelicolor* transiently duplicates all the

139 genes on that cosmid (except *lsp*) and because this region includes many important cell division genes (*ftsZ*,  
140 *ftsQ*, *ftsW*, *ftsI* and *ftsL*) and essential cell wall synthesis genes (*murG*, *murD*, *murX*, *murF* and *murE*) we  
141 reasoned that over-expression of these genes, rather than deletion of *lsp*, is responsible for the spontaneous  
142 secondary mutations and the resulting pleiotropic phenotype. To test this idea we introduced an origin of transfer  
143 into the wild-type St4A10 cosmid backbone and then conjugated this cosmid into strain M145 and selected for  
144 single cross-over events where the whole cosmid is integrated into the chromosome, thus duplicating the *S.*  
145 *coelicolor* genes on St4A10. Analysis of these single crossover strains, maintained on kanamycin to select for  
146 the cosmid, revealed them to be genetically unstable, with many initially appearing similar to the observed  $\Delta lsp$   
147 phenotype, i.e. small and delayed in sporulation (Figure 5). However, they lack the characteristic  $\Delta lsp$  over-  
148 production of the blue antibiotic actinorhodin and colonies from this M145::St4A10 strain also acquired more  
149 significant developmental issues upon prolonged maintenance and restreaking on MS agar containing kanamycin  
150 (not shown). This suggests they accumulate spontaneous secondary mutations as a direct result of carrying  
151 St4A10 and that the observed  $\Delta lsp$  phenotype is at least in part due to duplication of the genes on cosmid  
152 St4A10. This is consistent with the fact that complementation of  $\Delta lsp$  restored lipoprotein biogenesis but did not  
153 restore wild-type colony morphology<sup>5</sup>.

154

## 155 **Targeted deletion of *lsp* results in a small colony phenotype**

156 To test how much deletion of *lsp* contributed to the phenotype of BJT1001 (the  $\Delta lsp$  strain generated using  
157 Redirect) we undertook a targeted disruption of *lsp* in wild-type strain M145 using a suicide vector, which does  
158 not duplicate or affect any other coding sequences. The *lsp* suicide vector, pJM016 (Table 1), was introduced  
159 into wild-type *S. coelicolor* by conjugation and ex-conjugants were selected by growing on MS agar plates  
160 containing apramycin. Following introduction of the pJM016, two colony types were observed (Figure 6), one  
161 with wild-type appearance while the others were small colonies that over-produce actinorhodin, reminiscent of  
162 the *lsp* mutant BJT1001. PCR testing of the genomic DNA of both morphotypes revealed that those with the  
163 wild-type colony morphology have a wild-type fully functioning *lsp* gene whereas those with a small colony  
164 phenotype have disruptions in *lsp* caused by pJM016. PCR amplification followed by sequencing of the loci in  
165 the small colony variant revealed an interesting and unexpected recombination event had occurred: the vector  
166 and almost all the *lsp* gene have been removed such that all that remains is the apramycin resistance cassette  
167 (Supplementary Text S4 and S5 online). These data confirm that *lsp* is not essential in *S. coelicolor* but loss of

168 Lsp does result in a growth and developmental defect and overproduction of the blue antibiotic actinorhodin as  
169 observed previously<sup>5</sup>.

## 170 **Discussion**

171 The pleiotropic nature of the original *S. coelicolor*  $\Delta lsp$  strain BJT1001 resulted primarily from the introduction  
172 of cosmid St4A10, most likely caused by the over-expression of cell division and cell wall biosynthesis genes  
173 carried on that cosmid (Supplementary Table S2 online). It seems likely, but is not proven, that this led to the  
174 secondary mutations we observed in this strain. These secondary mutations do not make it easier to delete *lsp*  
175 suggesting they are not *lsp*-specific suppressors. Genetic manipulation has always been challenging in  
176 *Streptomyces* bacteria and the Redirect PCR targeting method has been a significant development but this work  
177 should be a cautionary tale to others to consider the effects of using large insert cosmid libraries in the genetic  
178 manipulation of bacteria. Recent advances in CRISPR/Cas9 editing of *Streptomyces* genomes<sup>21</sup> negate the need  
179 for a cosmid library and these techniques will accelerate research into the basic biology of *Streptomyces* and  
180 other filamentous actinomycetes. This is vital because the secondary metabolites derived from these bacteria still  
181 represent a major underutilised reservoir from which new antibiotics and other bioactive natural products can be  
182 discovered. Moreover, the identification here of the novel small RNA *scr6809* and demonstration that its  
183 deletion results in a range of growth and developmental defects add to the growing appreciation<sup>22–24</sup> of the  
184 significance of small RNAs in streptomycetes.

## 185 **Materials and Methods**

### 186 **Bacterial strains and culture conditions.**

187 All primers, plasmids and strains used are listed in Table 1. Strains were routinely grown as previously  
188 described<sup>5</sup> following the recipes of Kieser et al., (2000). *E. coli* was grown in LB or LB –NaCl for Hygromycin  
189 selection and *S. coelicolor* M145 and its derivatives were grown on Soya Flour Mannitol (SFM) medium to  
190 study growth and development or LB culture for genomic isolations.



191 **Table 1. Strains, plasmids and primers.**

| Strain       |                                                                                                                |                |            |                         |
|--------------|----------------------------------------------------------------------------------------------------------------|----------------|------------|-------------------------|
| E. coli      | Genotype/description                                                                                           | Plasmid (held) | Resistance | Source                  |
| TOP10        | F- mcrA Δ(mrr-hsdRMS-mcrBC) Φ80lacZΔM15 ΔlacX74 recA1 araD139 Δ(ara-leu) 7697 galU galK rpsL (StrR) endA1 nupG | -              | -          | Invitrogen              |
| BW25113      | F-, DE(araD-araB)567, lacZ4787(del)::rrnB-3, LAM-, rph-1, DE(rhaD-rhaB)568, hsdR514                            | pIJ790         | CmR        | Datsenko & Wanner, 2000 |
| ET12567      | dam- dcm- hsdM-                                                                                                | pUZ8002        | CmR/TetR   | MacNeil et al., 1992    |
| Streptomyces |                                                                                                                |                |            |                         |
|              | Genotype/description                                                                                           | Plasmid (used) | Resistance | Source                  |
| M145         | <i>S. coelicolor</i> wild type strain, SCP1-, SCP2-                                                            | -              | -          | Hopwood et al, 1985     |
| BJT1000      | M145 <i>lsp::apr</i>                                                                                           | -              | AprR       | Thompson et al., 2010   |
| BJT1001      | M145 <i>lspFLP</i>                                                                                             | -              | -          | Thompson et al., 2010   |
| BJT1004      | BJT1000 + <i>Sco lsp cis</i>                                                                                   | -              | -          | Thompson et al., 2010   |
| JTM005       | M145 <i>sco6808::apr</i>                                                                                       | pJM010         | AprR       | This work               |
| JTM007       | M145 <i>scr6809::apr</i>                                                                                       | pJM012         | AprR       | This work               |
| JTM008       | M145 <i>lsp::apr</i>                                                                                           | pJM013         | AprR       | This work               |
| JTM009       | M145 St4A10 <i>bla::hyg</i>                                                                                    | pJM014         | KanR/HygR  | This work               |
| JTM012       | BJT1004 <i>sco6808::apr</i>                                                                                    | pJM010         | AprR       | This work               |

|        |                                |        |           |           |
|--------|--------------------------------|--------|-----------|-----------|
| JTM015 | BJT1004 <i>lsp::apr</i>        | pJM013 | AprR      | This work |
| JTM018 | M145 <i>lsp</i> suicide vector | pJM016 | AmpR/AprR | This work |

| Plasmids    | Genotype/description                                                                                                  | Resistance     | Source                 |
|-------------|-----------------------------------------------------------------------------------------------------------------------|----------------|------------------------|
| pIJ773      | <i>aac(3)IV oriT</i> (contains apramycin ( <i>apr</i> ) resistance cassette)                                          | AprR           | Gust et al., 2002      |
| pIJ10700    | contains hygromycin resistance cassette, FRT <i>oriT-hyg</i> FRT MkII                                                 | HygR           | Gust et al., 2002      |
| pIJ790      | <i>araC-Parab, Y, β, exo, cat, repA100Its, oriR101</i>                                                                | CmR            | Gust et al., 2002      |
| pUZ8002     | RK2 derivative with a mutation in <i>oriT</i>                                                                         |                | Kieser et al., 2000    |
| pMS82       | <i>ori, pUC18, hyg, oriT, RK2, int ΦBT1</i>                                                                           | HygR           | Gregory et al., 2003   |
| pIJ10257    | <i>oriT, ΦBT1 attB-int, Hygr, ermEp*</i> , pMS81 backbone                                                             | HygR           | Hong et al., 2005      |
| pGEM-T-Eazy | <i>bla, lacZα</i>                                                                                                     | AmpR           | Promega                |
| St1A2       | Supercos-1-cosmid with (39829 bp) fragment containing ( <i>sco6808</i> and <i>scr6809</i> )                           | KanR/AmpR      | Redenbach et al., 1996 |
| St4A10      | Supercos-1-cosmid with (43147 bp) fragment containing ( <i>sco2074 - lsp</i> )                                        | KanR/AmpR      | Redenbach et al., 1996 |
| pJM010      | St1A2 containing <i>sco6808::apr oriT</i> (St1A2Δ <i>sco6808</i> )                                                    | KanR/AmpR/AprR | This work              |
| pJM012      | St1A2 containing <i>scr6809::apr oriT</i> (St1A2Δ <i>scr6809</i> )                                                    | KanR/AmpR/AprR | This work              |
| pJM013      | St4A10 containing <i>sco2074::apr oriT</i> (St4A10Δ <i>lsp</i> )                                                      | KanR/AmpR/AprR | This work              |
| pJM014      | St4A10 containing <i>bla::hyg oriT</i> (St1A2 <i>bla::hyg</i> )                                                       | KanR/HygR      | This work              |
| pJM015      | pMS82 containing full length <i>sco2074</i> and promoter (300 bp of upstream DNA)                                     | HygR           | This work              |
| pJM016      | <i>lsp</i> suicide vector, pGEM-T-Eazy, 411 bp fragment of the <i>lsp</i> gene with a BamHI site. The <i>aac(3)IV</i> | AmpR/AprR      | This work              |

containing BamHI fragment from a pIJ773 was sub cloned in.

pJM017 pMS82, KpnI/HindIII insert containing, pMC500 MCS and terminators with *scr6809* (see Text S3) HygR This work

193

| Primer | Sequence                                                        | Description                                                                                | Source    |
|--------|-----------------------------------------------------------------|--------------------------------------------------------------------------------------------|-----------|
| JM0083 | GTCTATGGTTGACGGGTGACTGTCATAGAT<br>CTGCAGATGATTCCGGGGATCCGTCGACC | <i>sco6808</i> forward disruption primer (Redirect)                                        | This work |
| JM0084 | GTCATCTTCCGAACGGAGATGGAGGGAGAT<br>CCGGAATCATGTAGGCTGGAGCTGCTTC  | <i>sco6808</i> reverse disruption primer (Redirect)                                        | This work |
| JM0085 | CGGAGGCCGCTGTCCTAGC                                             | <i>sco6808</i> forward test primer                                                         | This work |
| JM0086 | AACGCGCACTCGCTGCGGTC                                            | <i>sco6808</i> reverse test primer                                                         | This work |
| JM0091 | TCCGACATCTGCAGATCTATGACAGTCACC<br>CGTCAACCAATTCCGGGGATCCGTCGACC | <i>scr6809</i> forward disruption primer (Redirect)                                        | This work |
| JM0092 | TGGTACACGGCACCGACTCCGGCTGCCAGA<br>AAGCCATAGTGTAGGCTGGAGCTGCTTC  | <i>scr6809</i> reverse disruption primer (Redirect)                                        | This work |
| JM0093 | CAGACGCAGGCCTCGCCATC                                            | <i>scr6809</i> forward test primer                                                         | This work |
| JM0094 | CCCATCGCTACGGCCGCCT                                             | <i>scr6809</i> reverse test primer                                                         | This work |
| JM0093 | AATCAATCTAAAGTATATATGAGTAACTT<br>GGTCTGACAGTCAGGCGCCGGGGCGGTG   | <i>bla</i> ( <i>bla::hyg</i> ) gene forward disruption primer (Redirect) for<br>supercos-1 | This work |
| JM0096 | CCCTGATAAATGCTTCAATAATATTGAAAA                                  | <i>bla</i> ( <i>bla::hyg</i> ) gene forward disruption primer (Redirect) for               | This work |

|        |                                                                 |                                                                                                          |                       |
|--------|-----------------------------------------------------------------|----------------------------------------------------------------------------------------------------------|-----------------------|
|        | AGGAAGAGTAAGTTCCCGCCAGCCTCGCA                                   | supercos-1                                                                                               |                       |
| JM0097 | AAGCAGCAGATTACGCGCAG                                            | <i>bla</i> ( <i>bla::hyg</i> ) gene forward test primer (Redirect) for supercos-1                        | This work             |
| JM0098 | GTGCGCGGAACCCCTATTTG                                            | <i>bla</i> ( <i>bla::hyg</i> ) gene forward test primer (Redirect) for supercos-1                        | This work             |
| JM0099 | TCGTGCTCAGTCAAGGACCTAGGCTGAGGG<br>ACTCACGTGATTCCGGGGATCCGTCGACC | <i>lsp</i> ( <i>sco2074</i> ) forward disruption primer (Redirect)                                       | This work             |
| JM0100 | GACAACCAGTCCCTGTGGACAGCCGGACCG<br>GAGGGGTCATGTAGGCTGGAGCTGCTTC  | <i>lsp</i> ( <i>sco2074</i> ) reverse disruption primer (Redirect)                                       | This work             |
| JM0113 | GCAACAGTGCCGTTGATCGTGCTATG                                      | pMS82 cloning forward test primer                                                                        | This work             |
| JM0114 | GCCAGTGGTATTTATGTCAACACCGCC                                     | pMS82 cloning reverse test primer                                                                        | This work             |
| JM0115 | GGATCCCTGTTTCGCGGTCGCCCTGTTTCGCGT<br>ACCT                       | Forward primer amplifies a 411 bp fragment of the <i>lsp</i> gene, adding a <i>bam</i> HI site upstream. | This work             |
| JM0116 | GATGCCGCCGCACACGATCGCCGAGTCGG                                   | Reverse primer amplifies a 411 bp fragment of the <i>lsp</i> gene                                        | This work             |
| JM0150 | TCGTGCTCAGTCAAGGACCT                                            | Sco Lsp Test For                                                                                         | Thompson et al., 2010 |
| JM0151 | GACAACCAGTCCCTGTGGAC                                            | Sco Lsp Test Rev                                                                                         | Thompson et al., 2010 |
| JM0154 | AAGCTTCGACGAGGCGGACACAGGCAG                                     | <i>lsp</i> ( <i>sco2074</i> ) comp (pMS82) for HindII                                                    | This work             |
| JM0155 | GGTACCTCAGTCCTTGTGGACGGTCCCGTC                                  | <i>lsp</i> ( <i>sco2074</i> ) comp (pMS82) Rev KpnI                                                      | This work             |

194

195 **Table 1. Strains, plasmids and primers**

## 196 **Gene deletions and complementation**

197 Gene deletions were carried out following the Redirect method of PCR-targeting<sup>26</sup> as previously described  
198 Hutchings *et al.* (2006). Disruption of *lsp* (*sco2074::apr*) on cosmid St4A10 (pJM013, St4A10Δ*lsp*) using the  
199 pIJ773 apramycin disruption-cassette and *sco6808* (*sco6808::apr*) and *scr6809* (*scr6809::apr*) on cosmid St1A2  
200 (pJM010 - St1A2Δ*sco6808* and pJM012 - St1A2Δ*sco6808* respectively) using primers JM0101-2, JM0083-84  
201 and JM0091-2 respectively were confirmed by PCR using primers JM0150-1, JM0085-6 and JM0093-4  
202 respectively. Introduction of the wild-type cosmid St4A10 was facilitated by introducing an *oriT* by disruption  
203 and replacement of the Supercos-1 backbone *bla* resistance gene (pJM014 – St4A10*bla::hyg*) using primers  
204 JM0095-6 and the hygromycin disruption cassette from pIJ10701, confirmed using primers JM0099-100. The  
205 *lsp* suicide vector pJM016 was produced by introducing a 411 bp fragment of the *lsp* gene with an N-terminal  
206 *Bam*HI site, amplified with primers JM0117-8 and cloned into pGEM T-Eazy. The *Bam*HI site was then used to  
207 subclone the *Bam*HI fragment from a pIJ773 digest, containing an *apr* disruption cassette. An overexpression  
208 construct, pJM017 was synthesised by Genscript to include the pMC500 MCS and terminators<sup>28</sup> with *scr6809*  
209 (sequence included in Supplementary Text S5 online). All constructs were subsequently conjugated into *S.*  
210 *coelicolor* following the method described by Gust *et al.* (2002).

211

## 212 **Genomic DNA isolation**

213 Genomic DNA was isolated from M145 and BJT1004 following the Pospiech and Neumann (1995) salting out  
214 method as described by Keiser *et al.* (2000). Mycelium from a 30 ml culture was resuspended in 5 ml SET  
215 buffer containing 1 mg/ml lysozyme and incubated at 37°C 30-60 min. To this lysate, 140 μl of proteinase K  
216 solution (20 mg ml<sup>-1</sup>) was added, mixed, then 600 μl of 10% SDS added, mixed and incubated at 55°C for 2 h,  
217 with occasional mixing throughout. After this incubation 2 ml of 5 M NaCl was added, mixed and left to cool to  
218 37°C before adding 5 ml chloroform, mixed at 20°C for 30 min. Samples were centrifuged at 4500 x g for 15  
219 min at 20°C. The supernatant was removed to a fresh tube and DNA precipitated by adding 0.6 volumes of 100%  
220 isopropanol. Tubes were mixed by inversion and after at least 3 min DNA spooled out using a sterile Pasteur  
221 pipette. The DNA was rinsed in 70% ethanol, air dried and dissolved in 1-2 ml TE buffer (10 mM Tris-HCl pH  
222 7.8, 1 mM EDTA) at 55°C.

223

## 224 **Genome resequencing and secondary mutation identification**

225 The isolated DNA from our wild-type *S. coelicolor* M145 parent strain and BJT1004 were sent to both GATC  
226 Biotech and The Genome Analysis Centre (TGAC) for 35bp paired end HiSeq Illumina sequencing. Assembly  
227 mapping and SNP identification was carried out with MIRA (Chevreux et al., 2004) using the reference genome  
228 NC\_003888 (Bentley et al., 2002) as a scaffold for mapping each of the resequenced genomes. Putative SNPs  
229 were detected in each sample independently reporting the SNP position, the nucleotide change, the number of  
230 reads that sequence the region, those containing wild-type or mutated nucleotides and a percentage change.  
231 Each set of results was then compared by eye to determine the likely hood that a SNP was real by number of  
232 reads containing the mutation and its presence in each sample. Larger mutations (rearrangements) were  
233 identified in the same fashion.

234

## 235 **Microscopy**

236 Brightfield images were acquired using a Zeiss M2 Bio Quad SV11 stereomicroscope. Samples were illuminated  
237 from above using a halogen lamp images captured with an AxioCam HRc CCD camera. The AxioVision  
238 software (Carl Zeiss, Welwyn Garden City, UK) was used for image capture and processing.

## 239 **References**

- 240 1. Hutchings, M. I., Palmer, T., Harrington, D. J. & Sutcliffe, I. C. Lipoprotein biogenesis in Gram-positive  
241 bacteria: knowing when to hold 'em, knowing when to fold 'em. *Trends Microbiol.* **17**, 13–21 (2009).
- 242 2. Buddelmeijer, N. The molecular mechanism of bacterial lipoprotein modification--How, when and why?  
243 *FEMS Microbiol. Rev.* **39**, 246–261 (2015).
- 244 3. Sutcliffe, I. C., Harrington, D. J. & Hutchings, M. I. A phylum level analysis reveals lipoprotein  
245 biosynthesis to be a fundamental property of bacteria. *Protein Cell* **3**, 163–170 (2012).
- 246 4. Galnick, J. a, Vali, H., Lies, D. P. & Newman, D. K. Extracellular respiration of dimethyl sulfoxide by  
247 *Shewanella oneidensis* strain MR-1. *Proc. Natl. Acad. Sci. U. S. A.* **103**, 4669–74 (2006).
- 248 5. Thompson, B. J. *et al.* Investigating lipoprotein biogenesis and function in the model Gram-positive  
249 bacterium *Streptomyces coelicolor*. *Mol. Microbiol.* **77**, 943–957 (2010).
- 250 6. Shruthi, H., Babu, M. M. & Sankaran, K. TAT-pathway-dependent lipoproteins as a niche-based

- 251 adaptation in prokaryotes. *J. Mol. Evol.* **70**, 359–70 (2010).
- 252 7. Rahman, O., Cummings, S. P., Harrington, D. J. & Sutcliffe, I. C. Methods for the bioinformatic  
253 identification of bacterial lipoproteins encoded in the genomes of Gram-positive bacteria. *World J.*  
254 *Microbiol. Biotechnol.* **24**, 2377–2382 (2008).
- 255 8. Okuda, S. & Tokuda, H. Lipoprotein Sorting in Bacteria. *Annu. Rev. Microbiol.* **65**, 239–259 (2011).
- 256 9. Narita, S. I., Matsuyama, S. I. & Tokuda, H. Lipoprotein trafficking in Escherichia coli. *Arch. Microbiol.*  
257 **182**, 1–6 (2004).
- 258 10. Jan, G., Fontenelle, C., Le Hénaff, M. & Wróblewski, H. Acylation and immunological properties of  
259 Mycoplasma gallisepticum membrane proteins. *Res. Microbiol.* **146**, 739–750 (1995).
- 260 11. Asanuma, M. *et al.* Structural evidence of  $\alpha$ -aminoacylated lipoproteins of Staphylococcus aureus. *FEBS*  
261 *J.* **278**, 716–28 (2011).
- 262 12. Nakayama, H., Kurokawa, K. & Lee, B. L. Lipoproteins in bacteria: Structures and biosynthetic  
263 pathways. *FEBS J.* **279**, 4247–4268 (2012).
- 264 13. Kurokawa, K. *et al.* The Triacylated ATP Binding Cluster Transporter Substrate-binding Lipoprotein of  
265 Staphylococcus aureus Functions as a Native Ligand for Toll-like Receptor 2. *J. Biol. Chem.* **284**, 8406–  
266 11 (2009).
- 267 14. Serebryakova, M. V *et al.* The acylation state of surface lipoproteins of mollicute Acholeplasma  
268 laidlawii. *J. Biol. Chem.* **286**, 22769–76 (2011).
- 269 15. Widdick, D. a *et al.* Dissecting the complete lipoprotein biogenesis pathway in Streptomyces scabies.  
270 *Mol. Microbiol.* **80**, 1395–412 (2011).
- 271 16. Tschumi, A. *et al.* Functional analyses of mycobacterial lipoprotein diacylglyceryl transferase and  
272 comparative secretome analysis of a mycobacterial lgt mutant. *J. Bacteriol.* **194**, 3938–49 (2012).
- 273 17. Xiao, Y. & Wall, D. Genetic redundancy, proximity, and functionality of lspA, the target of antibiotic  
274 TA, in the Myxococcus xanthus producer strain. *J. Bacteriol.* **196**, 1174–1183 (2014).
- 275 18. Yang, Y. H. *et al.* Finding new pathway-specific regulators by clustering method using threshold  
276 standard deviation based on DNA chip data of Streptomyces coelicolor. *Appl. Microbiol. Biotechnol.* **80**,  
277 709–717 (2008).
- 278 19. Gust, B., Challis, G. L., Fowler, K., Kieser, T. & Chater, K. F. PCR-targeted Streptomyces gene  
279 replacement identifies a protein domain needed for biosynthesis of the sesquiterpene soil odor geosmin.  
280 *Proc. Natl. Acad. Sci. U. S. A.* **100**, 1541–6 (2003).

- 281 20. Redenbach, M. *et al.* A set of ordered cosmids and a detailed genetic and physical map for the 8 Mb  
282 *Streptomyces coelicolor* A3(2) chromosome. *Mol. Microbiol.* **21**, 77–96 (1996).
- 283 21. Cobb, R. E., Wang, Y. & Zhao, H. High-Efficiency Multiplex Genome Editing of *Streptomyces* Species  
284 Using an Engineered CRISPR/Cas System. *ACS Synth. Biol.* **4**, 723–8 (2014).
- 285 22. Vockenhuber, M.-P. *et al.* Deep sequencing-based identification of small non-coding RNAs in  
286 *Streptomyces coelicolor*. *RNA Biol.* **8**, 468–477 (2011).
- 287 23. Moody, M. J., Young, R. A., Jones, S. E. & Elliot, M. A. Comparative analysis of non-coding RNAs in  
288 the antibiotic-producing *Streptomyces* bacteria. *BMC Genomics* **14**, 558 (2013).
- 289 24. Romero, D. A. *et al.* A comparison of key aspects of gene regulation in *Streptomyces coelicolor* and  
290 *Escherichia coli* using nucleotide-resolution transcription maps produced in parallel by global and  
291 differential RNA sequencing. *Mol. Microbiol.* **94**, 963–987 (2014).
- 292 25. Kieser, T., Bibb, M. J., Buttner, M. J., Chater, K. F. & Hopwood, D. A. Practical *Streptomyces* Genetics.  
293 *John Innes Cent. Ltd.* 529 (2000). doi:10.4016/28481.01
- 294 26. Gust, B., Kieser, T. & Chater, K. PCR targeting system in *Streptomyces coelicolor* A3 (2). *John Innes*  
295 *Cent.* **3**, 1–39 (2002).
- 296 27. Hutchings, M. I., Hong, H.-J., Leibovitz, E., Sutcliffe, I. C. & Buttner, M. J. The sigma(E) cell envelope  
297 stress response of *Streptomyces coelicolor* is influenced by a novel lipoprotein, CseA. *J. Bacteriol.* **188**,  
298 7222–9 (2006).
- 299 28. Gao, C., Mulder, D., Yin, C. & Elliot, M. a. Crp Is a Global Regulator of Antibiotic Production in  
300 *Streptomyces*. *MBio* **3**, 1–12 (2012).
- 301 29. Bentley, S. D. *et al.* Complete genome sequence of the model actinomycete *Streptomyces coelicolor*  
302 A3(2). *Nature* **417**, 141–147 (2002).

## 303 **Acknowledgments.**

304 We thank Marie Elliot for sharing unpublished RNA sequence data for *Streptomyces coelicolor* M145. This  
305 work was supported by a NERC PhD studentship to JTM and BBSRC grants BB/F009429/1 and BB/F009224/1  
306 to MIH and TP, respectively.

307



## 308 **Author contribution**

309 JTM designed and carried out the experiments, JTM ICS TP MIH designed experiments, JTM DAW ICS TP  
310 MIH analysed data and wrote the manuscript, DAW prepared DNA for sequencing, GC analysed sequencing  
311 data.

## 313 **Additional information**

314 **Supplementary information** accompanies this paper at:

315 **Competing financial interests:** The authors declare no competing financial interests.

316

## 317 **Figure legends**

318 **Figure 1. Lipoprotein biogenesis in *Streptomyces coelicolor*.** Approximately 80% of precursor lipoproteins in  
319 *S. coelicolor* are translocated via the general secretory (Sec) pathway with around 20% being translocated by the  
320 twin arginine transport (Tat) pathway (A). Following translocation across the cytoplasmic membrane they are  
321 diacylated on the thiol of the lipobox (+1) cysteine residue by Lgt1 or Lgt (B) and then the signal sequence is  
322 cleaved by Lsp immediately upstream of that modified cysteine (C). Lnt1 then adds a third acyl chain to the  
323 amino group on the +1 cysteine to produce a triacylated lipoprotein (D). Lnt2 is not essential for triacylation *in*  
324 *vitro* but appears to increase its efficiency. The function of the N-acyl modification is not yet known.

325

326 **Figure 2. IS21 insertion into *scr6809*.** The *sco6811-08* region of the *S. coelicolor* M145 genome contains 4  
327 genes (*sco6811* (Purple), *sco6810* (green), *sco6809* (yellow) and *sco6809* (blue) and a putative sRNA *scr6809*  
328 (large red) along with 3 putative promoters (broken arrows). Representations of the WT loci (A) and that  
329 sequenced from BJT1004 (B) indicate where an IS21 element (*sco6393* and *sco6394*) has inserted within  
330 *scr6809*. PCR verification of the IS21 insertion with primers JM0093 and JM0094 (small red arrows) was  
331 carried out (C) using M145 (lane 1), BJT1001 (lane 2) and BJT1004 (lane 3) genomic DNA. Lanes marked L  
332 contain the size ladders (Invitrogen 1kb plus DNA ladder), lane 1 contains the PCR product using wild-type  
333 M145 DNA (514 bp), lane 2 contains the PCR product using  $\Delta$ *lsp* strain BJT1001 DNA and lane 3 contains the  
334 PCR product using genomic DNA from the cis complemented  $\Delta$ *lsp* strain BJT1004 (both 2884 bp).

335

336 **Figure 3. Analysis of the IS21 disrupted genomic region in *S. coelicolor*.** Colony morphology (A) shows that  
337 deletion of *sco6808* has no obvious effect on growth or development in wild-type M145 but does partially

338 restore sporulation in BJT1004 (recovery of *scr6809*). Disruption of *scr6809* in M145 results in a range of  
339 pleiotropic morphological and developmental phenotypes (B).

340

341 **Figure 4. New *lsp* mutants generated using Redirect do not contain the *IS21* mutation.** Colony morphology  
342 of mutants *lsp::apr* 1-10 (corresponding to strains JTM008.01 – JTM008.10), both single (n=7, colonies 1-2, 4-7  
343 and 9-10) and double crossovers (n=3, colonies: 3 and 7-8) show a range of phenotypes (A). PCR of the *lsp* loci  
344 indicates colonies are either a single (WT and/or mutant band) or double (mutant band only) crossovers (WT =  
345 687 bp, mutant = 1447 bp).

346

347 **Figure 5. Introduction of wild-type St4A10 causes a pleiotropic phenotype.** Conjugation of M145 with  
348 St4A10 *bla::hyg* results in non-wildtype phenotypes similar to those observed in the St4A10 *lsp::apr* single  
349 crossovers.

350

351 **Figure 6. Targeted disruption of *lsp* using a suicide vector results in a small colony phenotype that over-**  
352 **produces actinorhodin.** To test how much of the BJT1001 phenotype is due to loss of *lsp* we disrupted the *lsp*  
353 gene using a suicide vector which does not affect or duplicate any other target genes. Plate images (A) show two  
354 distinct phenotypes following insertion of the suicide vector (pJM016) into M145, either a wildtype appearance  
355 (M145 pJM016 (1), n=3 corresponding to JTM018.03-04 and 08) or a small colony phenotype over producing  
356 actinorhodin (M145 pJM016 (2), n=7, corresponding to strains JTM018.01-2, 05-07 and 09-10) similar to our  
357 original observation of the *lsp* phenotype<sup>5</sup>.

358

Fig. 1

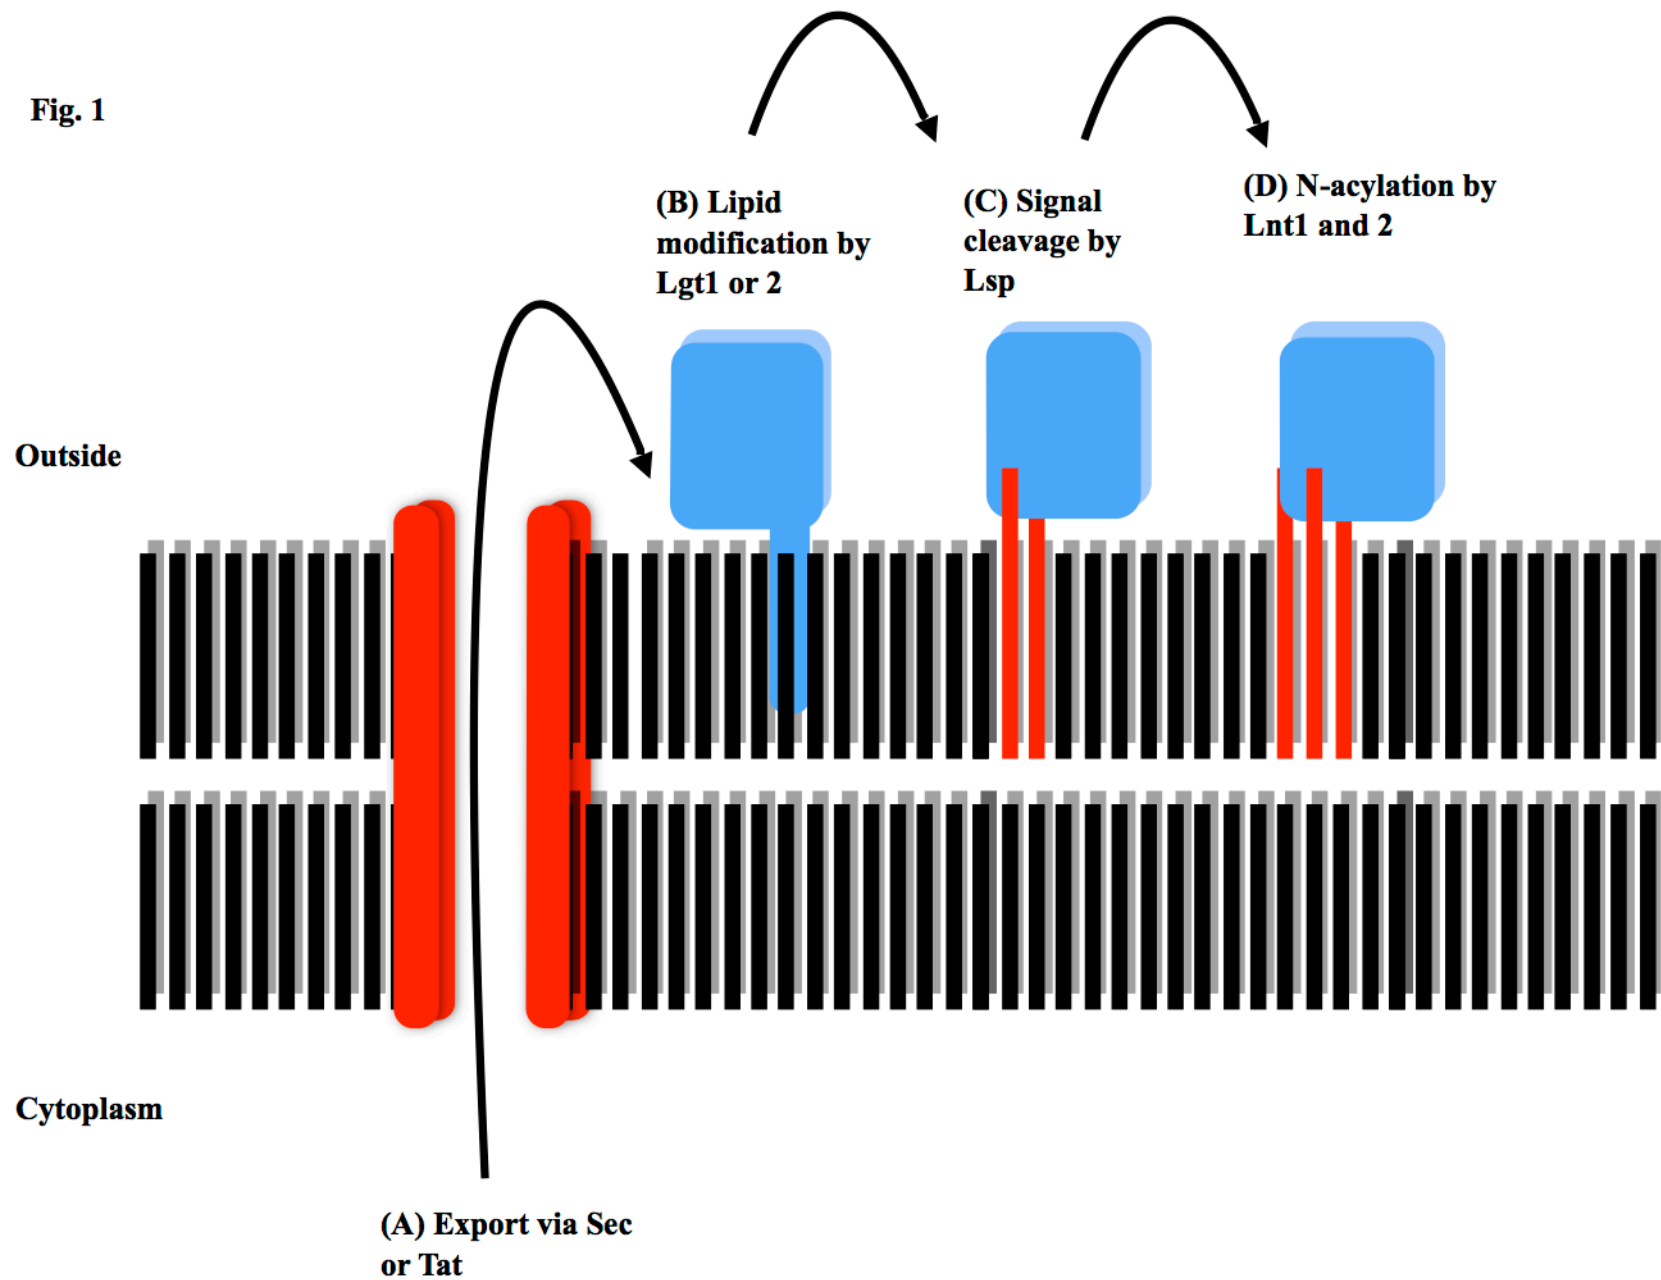

Fig. 2

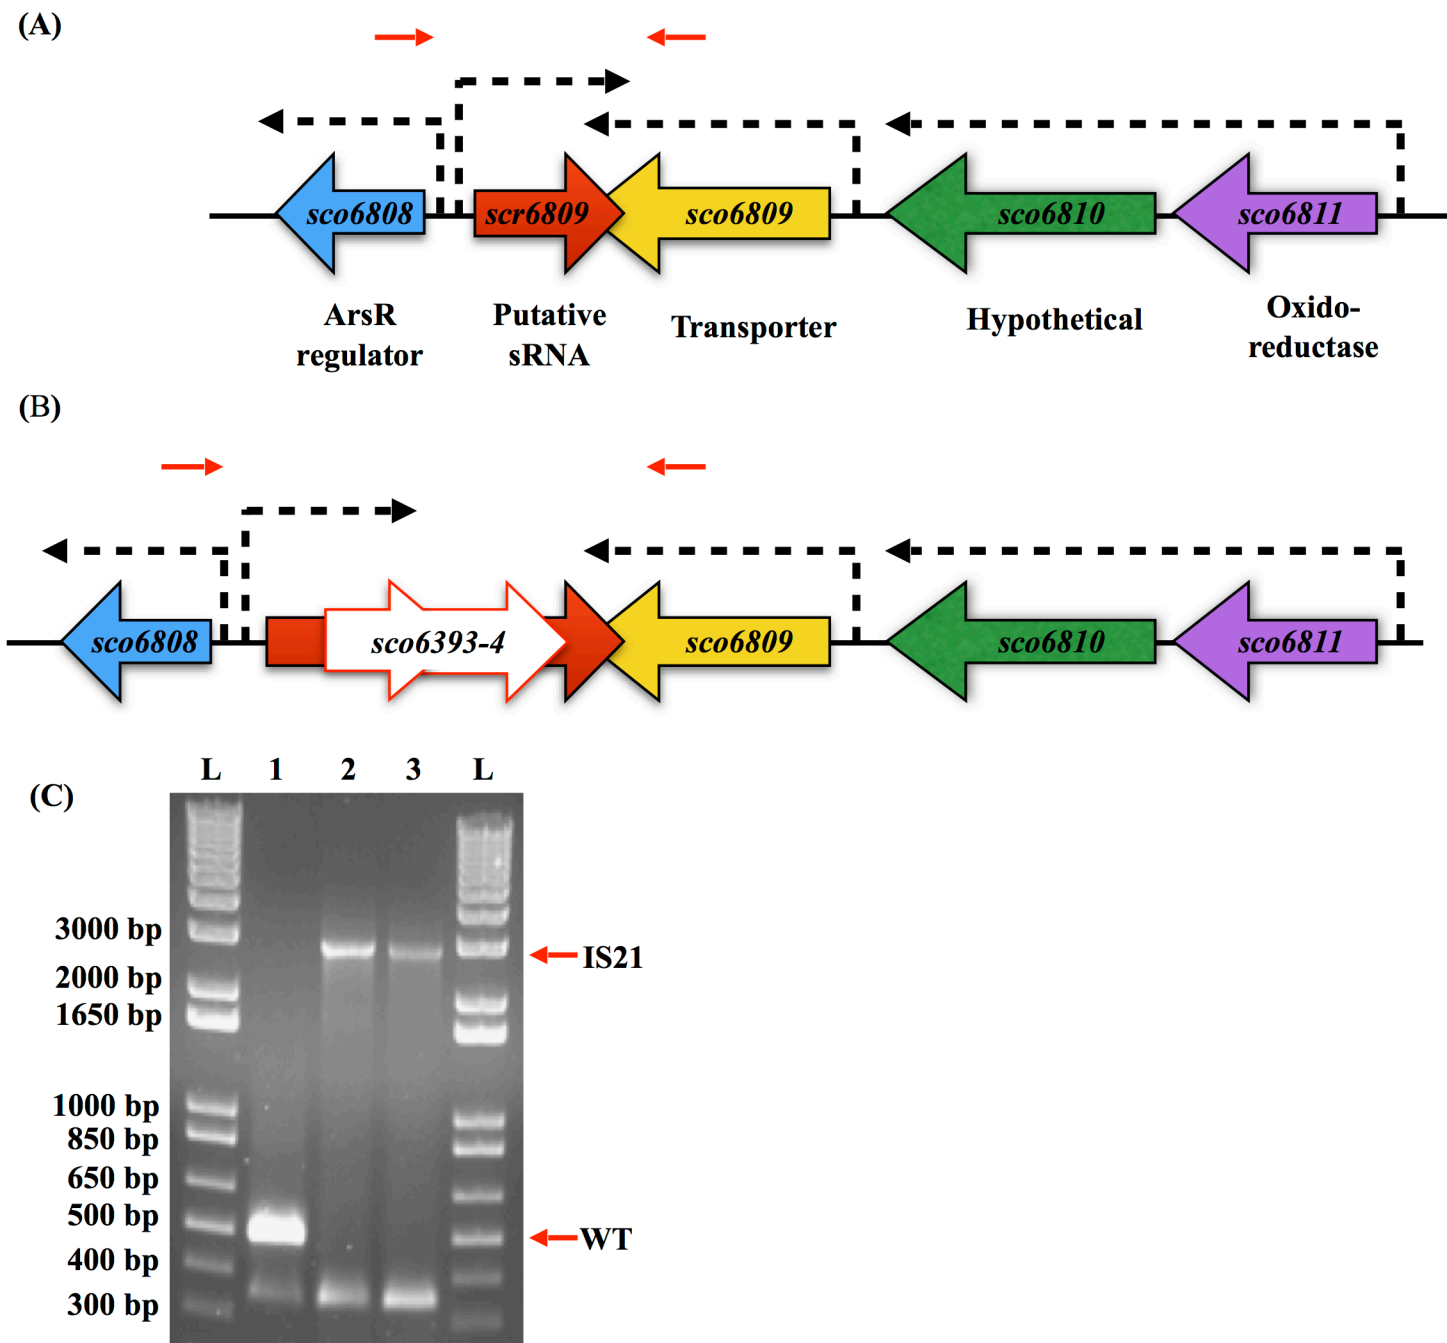

**Fig. 3**

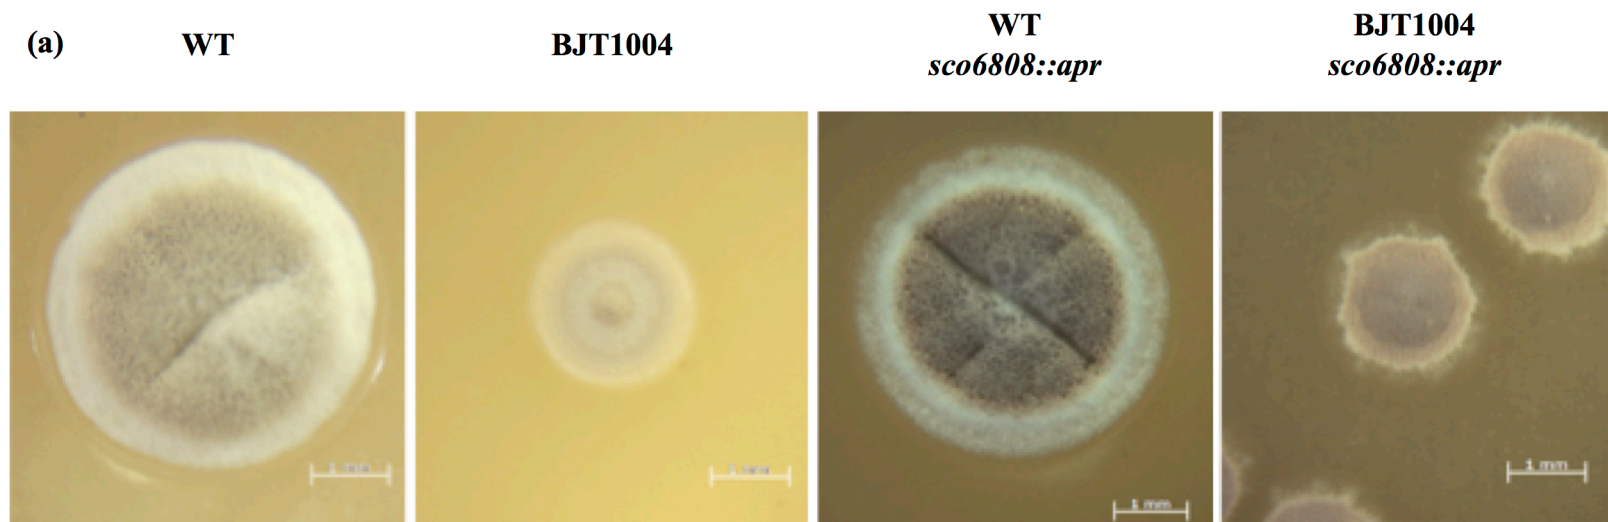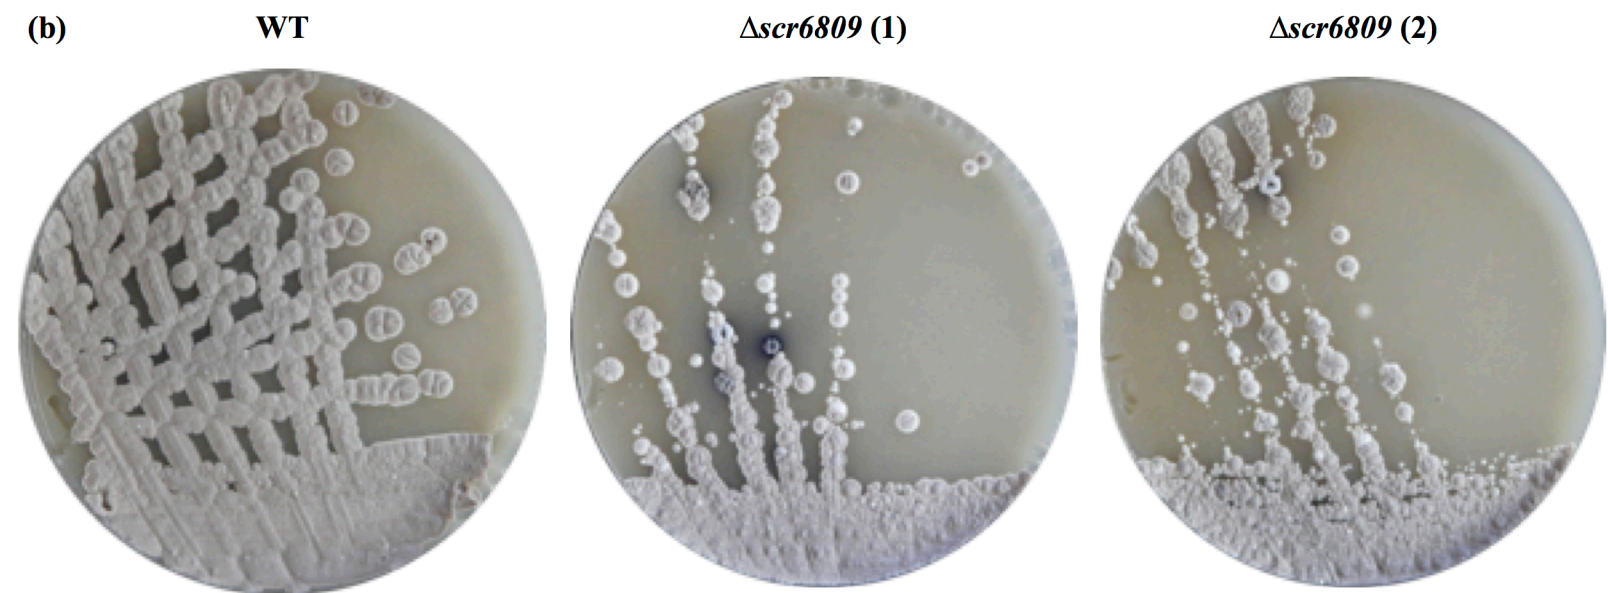

**Fig. 4****(a)****WT****BJT1004***lsp::apr* (1)*lsp::apr* (2)*lsp::apr* (3)*lsp::apr* (4)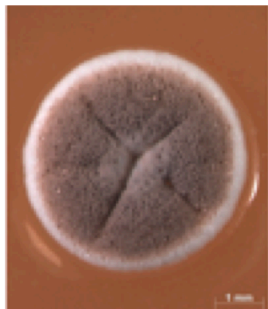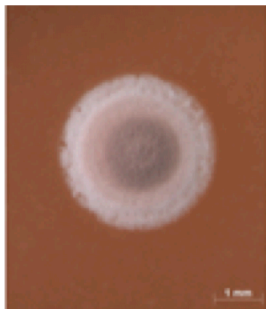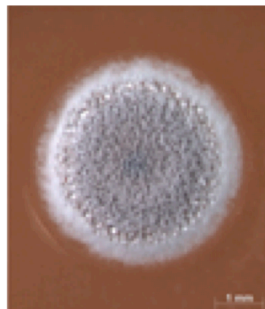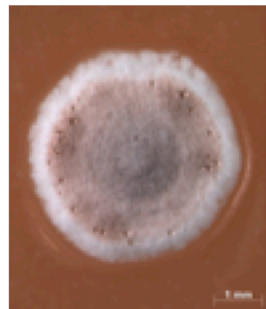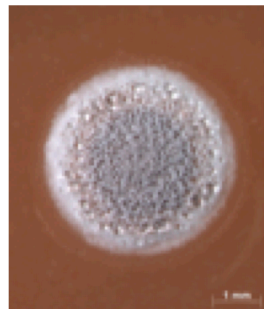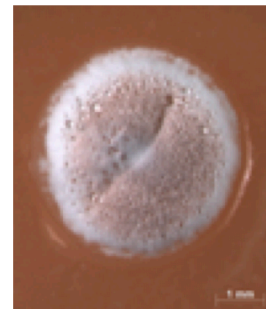*lsp::apr* (5)*lsp::apr* (6)*lsp::apr* (7)*lsp::apr* (8)*lsp::apr* (9)*lsp::apr* (10)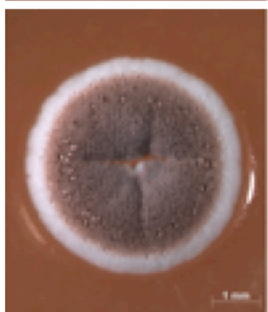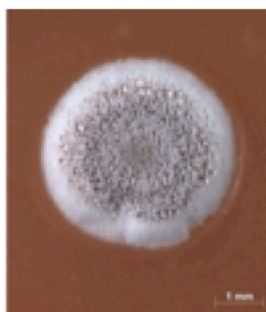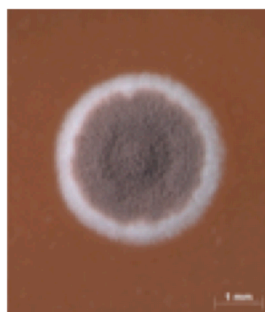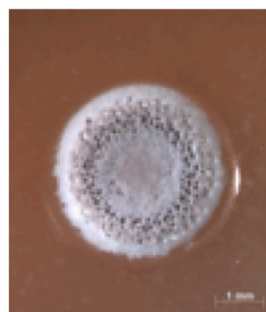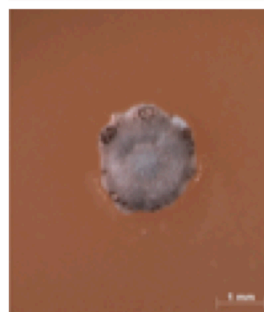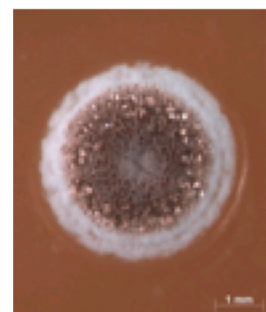**(b)**

|   |   |   |   |   |   |   |   |   |   |    |   |
|---|---|---|---|---|---|---|---|---|---|----|---|
| L | 1 | 2 | 3 | 4 | 5 | 6 | 7 | 8 | 9 | 10 | L |
|   | S | S | D | S | S | S | D | D | S | S  |   |

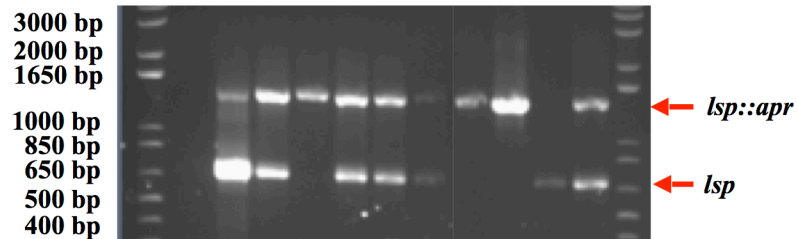**(c)**

|   |   |   |   |   |   |   |   |   |   |   |   |    |   |
|---|---|---|---|---|---|---|---|---|---|---|---|----|---|
| L | + | - | 1 | 2 | 3 | 4 | 5 | 6 | 7 | 8 | 9 | 10 | L |
|---|---|---|---|---|---|---|---|---|---|---|---|----|---|

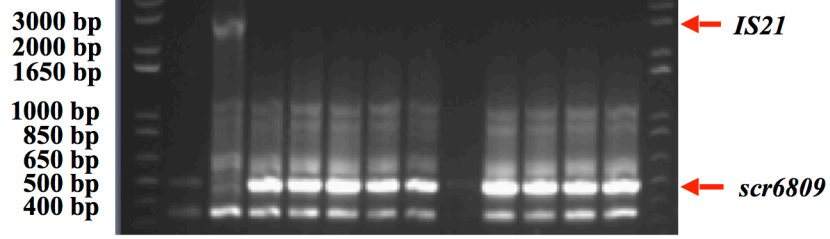

**Fig. 5**

**WT**

**St4A10 *Bla::hyg***

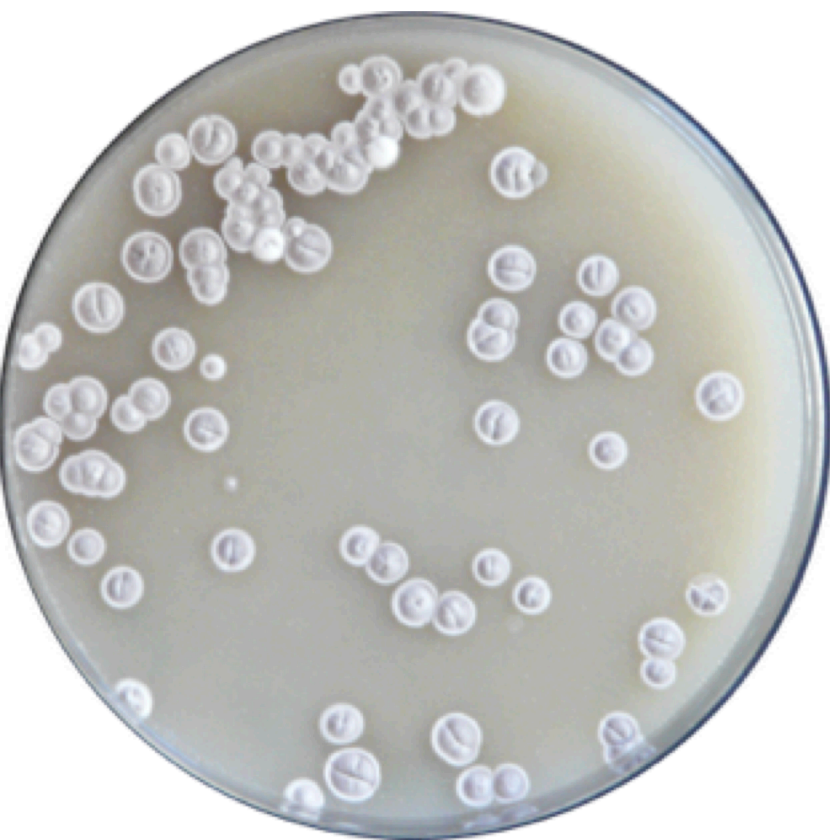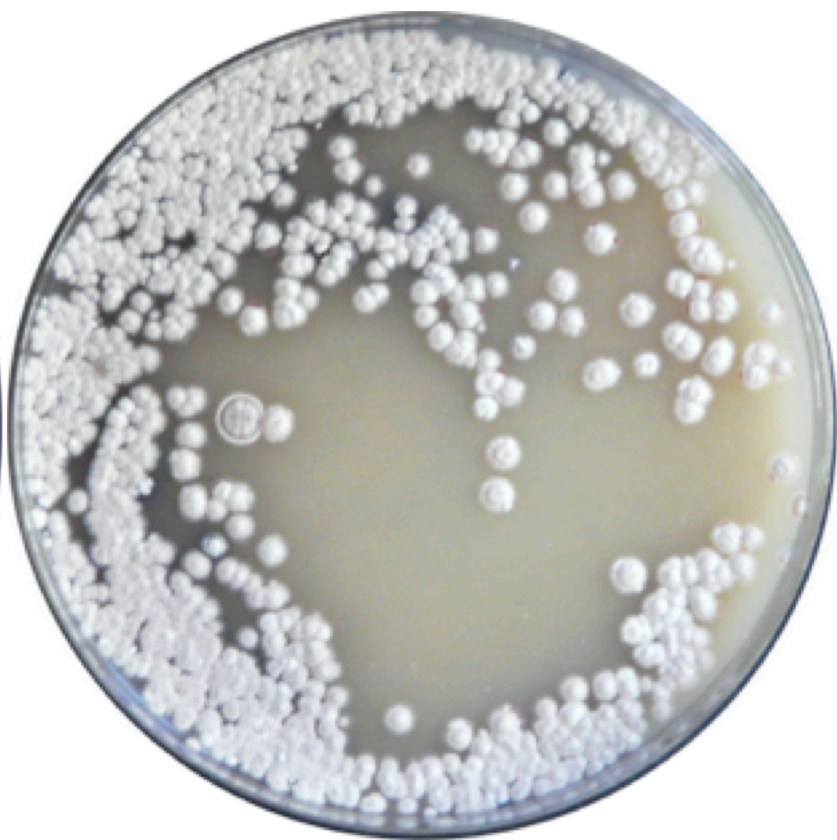

**Fig. 6****(a)****M145**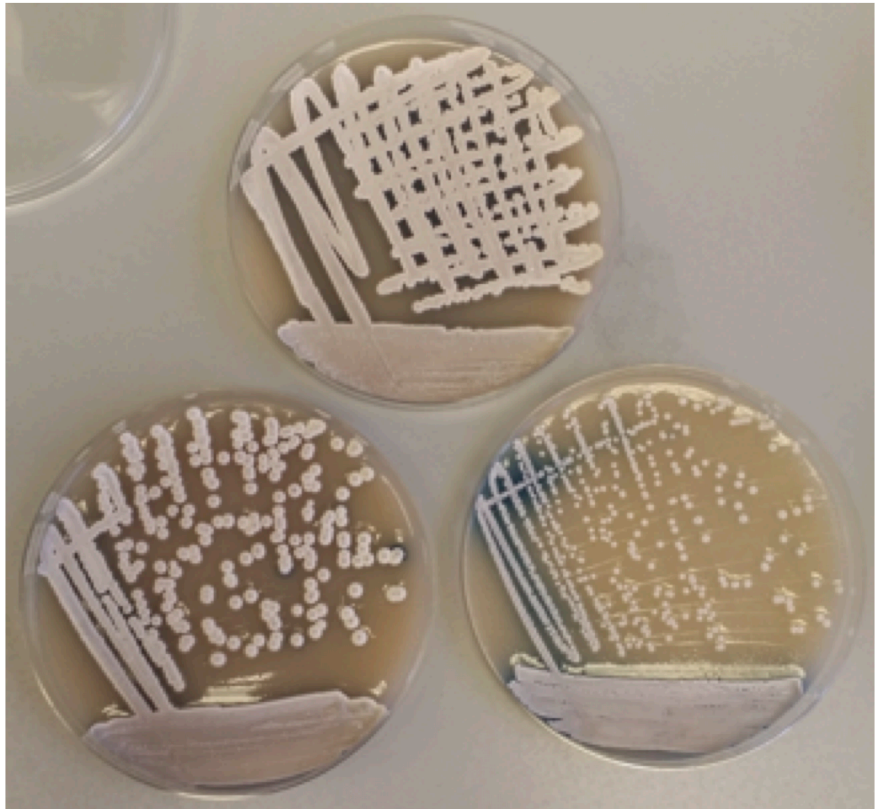**M145 pJM016 (1)****M145 pJM016 (2)****(b)**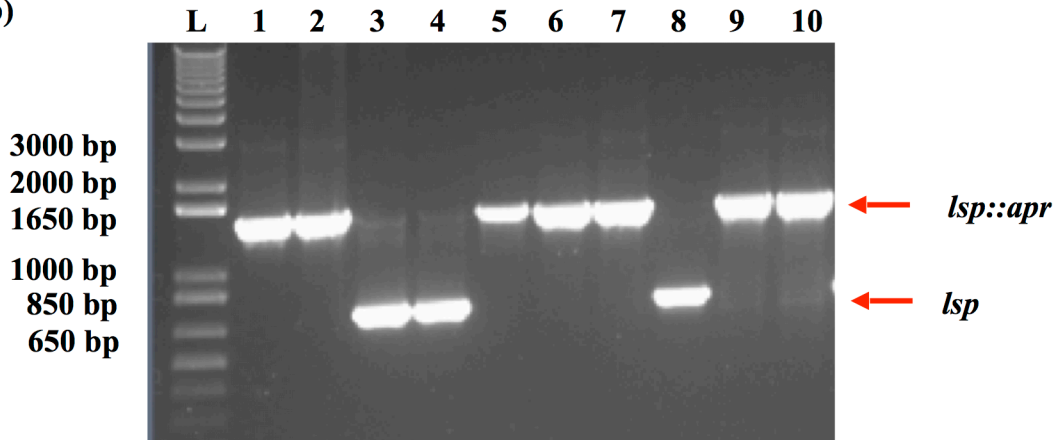

Source: http://www.biorxiv.org/content/10.1101/049320v1.full.pdf
